# Supplementary material for: Enhanced Antibacterial Activity of Dermaseptin through Its Immobilization on Alginate Nanoparticles—Effects of Menthol and Lactic Acid on Its Potentialization
Source: MDPI journal article supplement (doi:10.3390/antibiotics11060787), 2022-06-09
Supplement: s1 [file s1]

## Supplementary Information

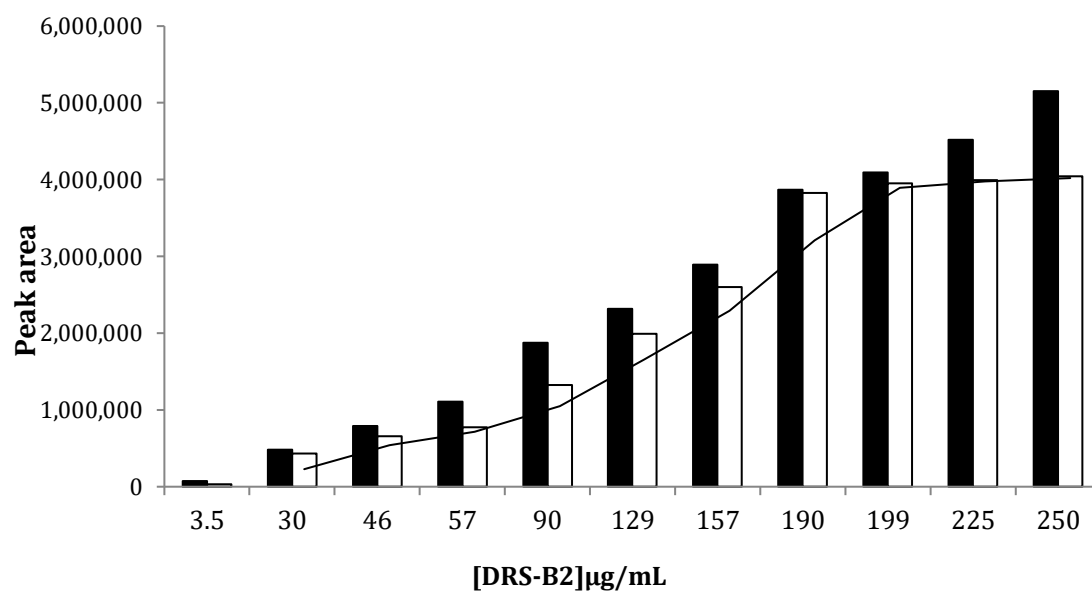

**Figure S1:** Variation of peak area of the different concentrations of DRS-B2 before (black rods) and after (white rods) dialysis. The concentration of Alg NPs was 500 µg/mL.

**Table S1:** Characterisation of the size and charge (zeta potential) of Alg NPs loaded or not with DRS-B2 at pH 6.3

| Formulations                                  | Size (nm) | Zeta Potential (ζ) (mv) |
|-----------------------------------------------|-----------|-------------------------|
| Alg NPs (500 µg/mL)                           | 111.1     | -22                     |
| Alg NPs (500 µg/mL)<br>+<br>DRS-B2 (40 µg/mL) | 128       | +0.9                    |
| DRSB2 (40 µg/mL)                              | -         | +23                     |
